# Supplementary material for: Evaluation of the Genotoxic and Oxidative Damage Potential of Silver Nanoparticles in Human NCM460 and HCT116 Cells
Source: PubMed Central journal article supplement (PMC7084348; doi:10.3390/ijms21051618), 2020-02-27
Supplement: ijms-21-01618-s001.pdf [file ijms-21-01618-s001.pdf]

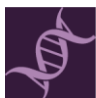

1 Supplementary Materials:

2 **Evaluation of the Genotoxic and Oxidative Damage**  
3 **Potential of Silver Nanoparticles in Human NCM460**  
4 **and HCT116 Cells**

5 Mingxi Jia <sup>1,2,†</sup>, Wenjing Zhang <sup>1</sup>, Taojin He <sup>1</sup>, Meng Shu <sup>1</sup>, Jing Deng <sup>1,2,†</sup>, Jianhui Wang <sup>3,†</sup>,  
6 Wen Li <sup>1,2,\*</sup>, Jie Bai <sup>1,\*</sup>, Qinlu Lin <sup>1</sup>, Feijun Luo <sup>1</sup>, Wenhua Zhou <sup>1</sup> and Xiaoxi Zeng <sup>2</sup>

7 **Table S1.** Gene Specific Primers Used for RT-PCR.

| Gene name     | Primer Sequence (5'–3')   |
|---------------|---------------------------|
| GAPDH Forward | CAGGAGGCATTGCTGATGAT      |
| GAPDH Reverse | GAAGGCTGGGGCTCATTT        |
| P53 Forward   | TCAGTCTACCTCCC GCCATA     |
| P53 Reverse   | TTACATCTCCCAAACATCCCT     |
| Bax Forward   | ACGAACTGGACAGTAACATGGAG   |
| Bax Reverse   | AGTTTGCTGGCAAAGTAGAAAAG   |
| Bcl2 Forward  | CATGGCAGTAAAGCAAG         |
| Bcl2 Reverse  | ATTGTTCCCATAGAGTTCCACAA   |
| P21 Forward   | ATGTGGACCTGTCAC TGTCTTGTA |
| P21 Reverse   | GTTGGAGTGGTAGAAATCTGTCAT  |

8

9

10

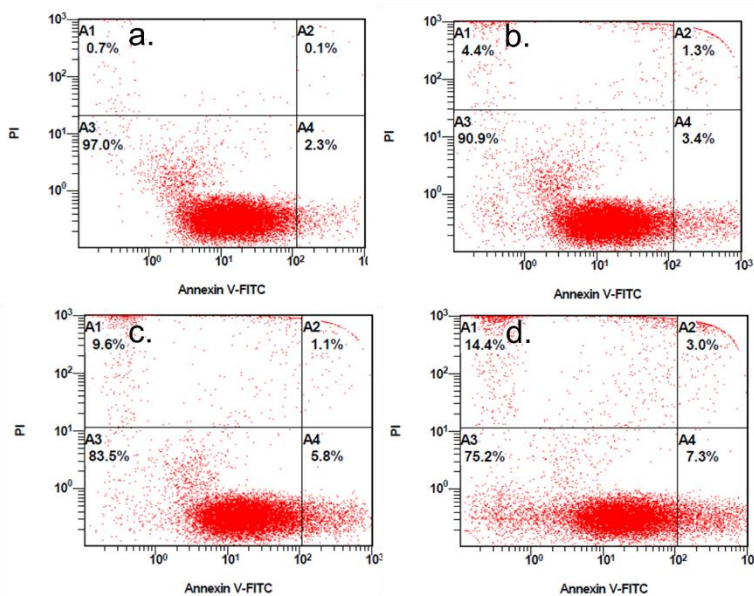

11

12 **Figure S1.** Flow cytometry results of HCT116 cells exposed to Ag nanoparticles. (a) control group; (b)  
13 15 μg/mL group; (c) 30 μg/mL group; (d) 60 μg/mL group.
